# Supplementary material for: An interchangeable prion-like domain is required for Ty1 retrotransposition
Source: PubMed Central journal article supplement — bioRxiv. 2023 Feb 27:2023.02.27.530227. Preprint. [Version 1] doi: 10.1101/2023.02.27.530227 (PMC10002725; doi:10.1101/2023.02.27.530227), 2023-02-27
Supplement: NIHPP2023.02.27.530227v1-supplement-1.pdf [file NIHPP2023.02.27.530227v1-supplement-1.pdf]

736  
737  
738  
739  
740  
741  
742  
743  
744  
745  
746  
747  
748  
749  
750  
751  
752  
753  
754  
755  
756  
757  
758  
759  
760  
761  
762  
763  
764  
765  
766

## Supplementary Information

### SI Materials and Methods

**Fig S1.** PrLD predictions for Ty1.

**Fig S2.** Prionogenic domains are intrinsically disordered in experimental and predicted protein structures.

**Fig S3.** Gag<sub>PrLD</sub> nucleates a Sup35-based prion reporter.

**Fig S4.** Gag chimeras likely disrupt Ty1 RNA functions and modestly increase cDNA recombination with plasmid-borne mini-Ty1*his3-AI*.

**Fig S5.** Chimeric Gag-GFP after 48 hr galactose induction.

**Fig S6.** Thin-section TEM of Gag-GFP strains.

**Fig S7.** VLP diameter of Gag-PrLD chimeras.

**Supplementary Table S1.** Retromobility frequencies.

**Supplementary Table S2.** Gag-GFP chimera fluorescent microscopy cell counts.

**Supplementary Table S3.** Yeast strains used in this study.

**Supplementary Table S4.** Plasmids used in this study.

**Supplementary Table S5.** Primers used in this study.

**Supplementary Table S6.** Gene fragments used in this study.

767

## SI Materials and Methods

768

769 **Plasmids and cloning.** Plasmids, primers, and gene fragments are listed in Supplementary  
770 Tables 4-6. All Ty1 nucleotide and amino acid information correspond to the Ty1H3 sequence  
771 (GenBank M18706.1). All cloning was done with NEBuilder HiFi DNA Assembly Master Mix  
772 (New England Biosciences cat. no. E2621). Sup35 fusion plasmids pBDG1691 (1434),  
773 pSLBB027 (1134), and pSLBB028 (1258), driven by the *CUP1* promoter, were kindly provided  
774 by Y. Chernoff (Chernoff lab plasmid nomenclature in parentheses). Sup35N plasmids contain  
775 Sup35 amino acids 1-123, and Sup35NM contains amino acids 1-250. The Gag<sub>PrLD</sub> contains  
776 Gag amino acids 66-136. Gag<sub>PrLD</sub> fusions to Sup35 were subcloned via EcoRI and XbaI digest  
777 and PCR from pBDG598 using primers SLBP0045-7. Hemagglutinin epitope (HA) tags were  
778 inserted via XbaI and SacII digest using ssDNA oligos AB42-HA (SLBP0088) or GagPrLD-HA  
779 (SLBP0087) and HA-tag-SacII (SLBP0086).

780 pBDG1647 was kindly provided by K. Pachulska-Wieczorek and is the mini-Ty1*his3*-AI  
781 plasmid (pJC994) which was constructed by deleting the HpaI-SnaBI fragment of pGTy1*his3AI*-  
782 [ $\Delta$ 1] (nucleotides 818-5463 of Ty1-H3) (6).

783 pBDG1781 contains pGTy1nt.241-5561 which is pEIB (“enzyme-in-a-box”). pEIB was  
784 kindly provided by J. Strathern. It was created by deleting the BglIII-NcoI fragment which  
785 removes the U3 polypurine tract (PPT) and 3' LTR, preventing reverse transcription of the Ty1  
786 RNA produced from pEIB. The original pEIB provided by J. Strathern also contained a multiply  
787 mutated primer binding sequence (PBS), disrupting complementarity to the initiator tRNA<sub>i</sub><sup>Met</sup>  
788 which primes reverse transcription. pBDG1781 was corrected back to the original Ty1H3 PBS  
789 sequence via XhoI and HpaI digest and PCR from pBDG598 using primers SLBP0116-7.

790 pBDG1781 derivatives were generated by replacing the Gag<sub>PrLD</sub> with custom commercial  
791 gene fragments (Integrated DNA Technologies (IDT) and Twist Bioscience) via XhoI and HpaI  
792 digest. *PrLD* $\Delta$  was cloned using SLBG0030 and the chimeras were cloned using overlapping  
793 gene fragments SLBG0024, SLBG0025 and a gene fragment encoding the foreign prion  
794 domain. The A $\beta$ <sub>1-42</sub> sequence used is identical to that in pBDG1691 provided by Y. Chernoff and  
795 contains a silent mutation at codon 3 (GAA>GAG) to remove an EcoRI site. Mouse PrP (UniProt  
796 P04925) amino acid sequence was codon optimized for *S. cerevisiae* using the IDT codon  
797 optimization tool.

798 pBDG1799 contains mature Gag (amino acids 1-401) driven by the *GAL1* promoter  
799 fused to GFP-(S65T) with a 7 amino acid linker (nt. CGGATCCCCGGGTTAATTAAC) followed  
800 by the *ADH1* terminator sequence, which was kindly provided by J. Curcio on plasmid BJC1066,

801 which is in a pRS415 backbone. The expression construct was subcloned to pRS413 (97) using  
802 primers SLBP0221-2 and inserted via XhoI and SacII digest to create pBDG1799. Derivatives  
803 were subcloned via XhoI and BbvCI digest and PCR from the corresponding chimeric pEIB  
804 plasmids using primers SLBP0117 and SLBP0194.

805 pBDG598 is pGTy1mhis3-AI, described in (59), and is driven by the *GAL1* promoter and  
806 is marked with the *his3-AI* retrotranscript indicator gene. Derivatives were subcloned via XhoI  
807 and HpaI digest and PCR from the corresponding chimeric pEIB plasmids using primers  
808 SLBP0116-7. All plasmids generated were verified by DNA sequencing.

809

810 **SDD-AGE.** Semi-denaturing detergent-agarose gel electrophoresis (SDD-AGE) was adapted  
811 from published methods (53, 54). Yeast were subcultured from an overnight SC-Ura starter  
812 culture into SC-Ura  $\pm$  100  $\mu$ M CuSO<sub>4</sub> and grown overnight at 30 °C. Approximately  $1 \times 10^8$  cells  
813 were lysed in 200  $\mu$ L of ice cold Buffer A (50 mM HEPES, pH 7.5; 150 mM NaCl; 2.5 mM EDTA;  
814 1% Triton X-100) with 400  $\mu$ g/mL PMSF, 16  $\mu$ g/mL each of aprotinin, leupeptin, pepstatin, and 6  
815 mM DTT by vortexing with glass beads twice for 5 minutes at 4 °C. Cell debris was removed by  
816 centrifugation for 2 minutes at 5000 rpm at 4 °C. 4X sample buffer (2X TAE; 20% glycerol; 4%  
817 SDS; bromophenol blue) was added to the supernatant and run on a 13 cm 1.8% agarose gel  
818 containing 1X TAE and 0.1% SDS at 50 V for several hours until the dye front reached 1 cm  
819 from the bottom of the gel. Proteins were transferred to PVDF using 1X TBS by downward  
820 capillary transfer overnight at room temperature. The membrane was immunoblotted by  
821 standard immunoblotting.

822

823 **Ty1*his3-AI* mobility assays.** Ty1 retromobility events were detected using the *his3-AI*  
824 retromobility indicator gene (59) by qualitative and quantitative assays (58). Qualitative assays  
825 were printed from glucose plates onto galactose plates, grown for 48 h at 22 °C, then printed to  
826 glucose plates lacking histidine and grown at 30 °C. Quantitative retromobility frequencies were  
827 determined from galactose inductions diluted in water, plated on synthetic dropout media, and  
828 colonies counted. All experiments were galactose-induced for 48 h at 22 °C. Data represent at  
829 least 8 independent galactose inductions; *p*-values were calculated by two-sided Student's *t*-  
830 test. Determination of likely cDNA recombinants versus likely genomic insertions was conducted  
831 on His<sup>+</sup> papillae isolated after 48 hr galactose induction. The *URA3*-bearing plasmid was  
832 counter-selected by growth on media containing 5-fluoroorotic acid. Cells that had lost the  
833 *TRP1*-bearing plasmid after single colony passaging on YPD were determined by printing to  
834 SC-Trp plates. Ura<sup>-</sup>/Trp<sup>-</sup> cells were tested for growth on SC-His. Loss of the His<sup>+</sup> phenotype

835 concomitant with plasmid loss indicates a likely cDNA recombinant since the only Ty1 sequence  
836 present for homologous recombination is on the plasmids. Retention of the His<sup>+</sup> phenotype  
837 indicates a likely genomic insertion. *p*-values were calculated by Fisher's exact test compared to  
838 wildtype. 100 retromobility events was selected for feasibility of data collection after estimating  
839 required sample size of 126 by *a priori* power analysis to detect increased recombination  
840 frequency of a 10% effect size with 80% power compared with a 5% recombinant frequency in  
841 wildtype piloted with 20 retromobility events. Power analysis for Fisher's exact test was  
842 performed using G\*Power 3.1 (98).

843

844 **Immunoblotting.** Total yeast protein was prepared by trichloroacetic acid (TCA) precipitation  
845 using standard techniques (58, 96). Briefly, cells were broken by vortexing in the presence of  
846 glass beads in 20% TCA and washed in 5% TCA. Proteins were separated on 8% or 10% SDS-  
847 PAGE gels. PVDF membranes were immunoblotted with antibodies at the following dilutions in  
848 2.5% milk-TBST: mouse monoclonal anti-HA antibody clone 2-2.2.14 (Invitrogen cat. no. 26183)  
849 (1:1000), mouse monoclonal anti-TY tag antibody clone BB2 (kindly provided by S. Hajduk)  
850 (1:10,000) (99), mouse monoclonal anti-IN clone 8B11 (kindly provided by J. Boeke) (1:1,000),  
851 rabbit polyclonal anti-RT (Boster Bio cat. no. DZ33991) (1:500), or mouse monoclonal anti-Pgk1  
852 antibody clone 22C5D8 (Invitrogen cat. no. 459250) (1:1000). Immune complexes were  
853 detected with WesternBright enhanced chemiluminescence (ECL) detection reagent (Advansta  
854 cat. no. K-12049-D50). All imaging was done using a ChemiDoc MP (Bio-Rad). Precision Plus  
855 Kaleidoscope protein standards (Bio-Rad cat. no. 1610395) were used to estimate molecular  
856 weights.

857

858 **Live cell fluorescence microscopy.** Following 24 or 48 hr galactose induction, cells were  
859 imaged directly in growth media on positively charged slides (Globe Scientific cat. no. 1358W)  
860 using a Zeiss Axio Observer.Z1 epifluorescence microscope equipped with an AxioCam HSm  
861 camera and captured using AxioVision v4.8.2 software (Carl Zeiss Microscopy).

862

863 **Sucrose gradient sedimentation.** Following 48 hr galactose induction, a 100 mL culture was  
864 harvested, and cells were broken in 15 mM KCl, 10 mM HEPES- KOH, pH 7, 5 mM EDTA  
865 containing RNase inhibitor (100 U/mL), and protease inhibitors (16 µg/mL aprotinin, leupeptin,  
866 pepstatin A and 2 mM PMSF) in the presence of glass beads. Cell debris was removed by  
867 centrifuging the broken cells at 10,000 x g for 10 min at 4°C. Clarified whole cell extract in 500  
868 µL of buffer was applied to a 7-47% continuous sucrose gradient and centrifuged using an



869 SW41 Ti rotor at 25,000 rpm (77,000 x g) for 3 hr at 4°C. After centrifugation, 9 x 1.2 mL  
870 fractions were collected, and input and fractions were immunoblotted with TY-tag antibody to  
871 detect Gag. Densitometric analysis was performed using Image Lab (Bio-Rad, v. 6.0.1).

872

873 **Transmission electron microscopy preparation and imaging of yeast cells.** Following 48 hr  
874 galactose induction, or 24 hr induction for GFP-expressing strains, cells were fixed with 4%  
875 formaldehyde - 2.5% glutaraldehyde in 0.1 M sodium cacodylate pH 7.4 for 2 hr at 4 °C, washed  
876 three times with cold PBS, once with cold 0.1 M KPO<sub>4</sub> (pH 6.5), and once with cold P solution  
877 (1.2 M sorbitol, 0.1 M KPO<sub>4</sub> pH 6.5). Cells were spheroplasted in P solution with 25 mM DTT for  
878 15 min at 37 °C using 400 µg/mL of Zymolyase-20T. Spheroplasts were gently washed three  
879 times with cold PBS, stored in 0.1 M sodium cacodylate pH 7.4 at 4 °C, and transported to the  
880 Robert P. Apkarian Integrated Electron Microscopy Core. Then the cells were washed in fresh  
881 0.1 M cacodylate buffer and spun for 5 minutes at 8000 rpm on an Eppendorf Centrifuge 5430.  
882 The cells were spun between each step and were processed in the microcentrifuge tubes in  
883 which they were received. After two 0.1 M cacodylate buffer washes of ten minutes each, the  
884 cells were post-fixed for an hour in 1% buffered osmium tetroxide. Following two ten-minute  
885 washes in distilled water, the cells were en-bloc stained with 0.5% Uranyl Acetate in 0.1 M  
886 sodium acetate for 30 minutes. The cells were washed in distilled water for 10 minutes, and  
887 then dehydrated in an ascending ethanol series of 15-minute steps starting with 25% and  
888 ending with 100% ethanol followed by two 15-minute steps of propylene oxide (PPO). The cells  
889 were infiltrated with Eponate12 (Ted Pella, Inc.) epoxy resin in four steps: 1:2 of resin to PPO,  
890 1:1 resin to PPO, 2:1 resin to PPO, and two changes of 100% resin. All resin steps were for 4  
891 hours to overnight, followed by a final change of fresh 100% resin. The cells in resin were then  
892 polymerized for two to three days at 60 °C. After release from the tubes, the sample blocks were  
893 faced. Ultrathin sections of 70 to 80 nm were made using a Reichert Ultracut S and a Diatome  
894 diamond knife. The sections were collected onto 200 mesh copper grids with Carbon stabilized  
895 Formvar™ support film then post-stained with 5% Uranyl Acetate and Reynold's Lead Citrate.  
896 Images were acquired using an Ultrascan 1000, 2K x 2K CCD digital camera, on a JEOL  
897 JEM1400 TEM operated at 80kV. Micrographs of 140-500 cells per strain were analyzed and  
898 representative images were selected for publication. Particle diameters were measured single-  
899 blind using FIJI version 2.3.0 (100) by counting at least 60 particles from all cells visible in the  
900 field of view (1-3 cells) in at least two separate micrographs.

901

## FIG. S1

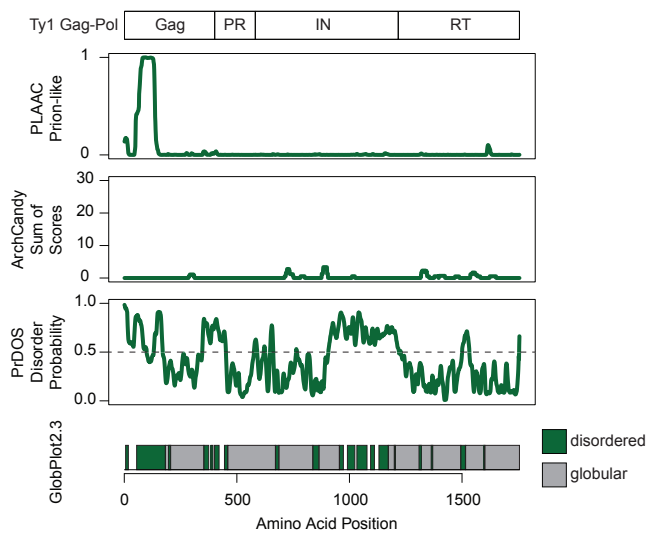

**Fig S1.** PrLD predictions for Ty1. Schematic of the Ty1 Gag-Pol p199 polyprotein (*top*). Below are bioinformatic analyses aligned with the schematic above: yeast prion-like amino acid composition (PLAAC), predicted amyloidogenic regions (ArchCandy), predicted protein disorder (PrDOS), predicted disordered (green) and globular (grey) regions (GlobPlot2.3).

FIG. S2

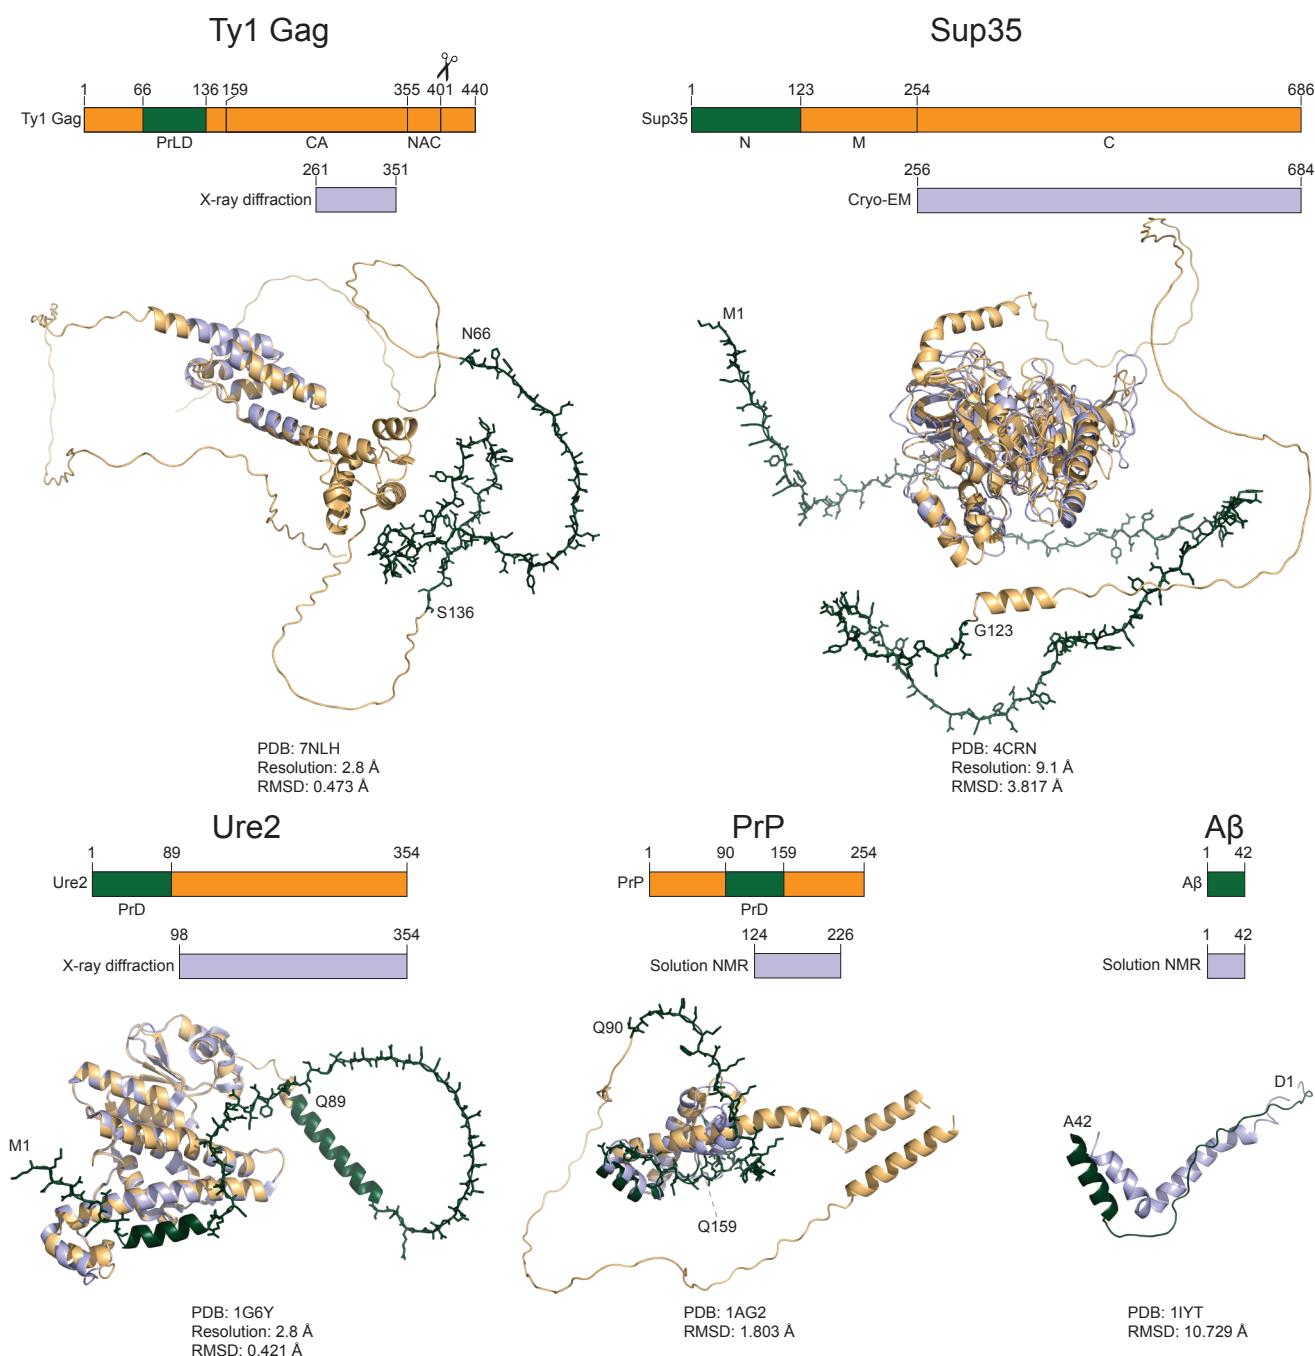

**Fig S2.** Prionogenic domains are intrinsically disordered in experimental and predicted protein structures. Schematics of protein domains (*top*) and experimentally determined protein structures with the methodology are noted (*bottom*). Amino acid coordinates are shown above cartoon representations of structures predicted by AlphaFold (orange) aligned to published structures (blue). Prion domains are colored in dark green, and their predicted disordered loops are shown in stick representation to aid visualization. PDB accession numbers and reported resolutions for published structures, and RMSD over the common residues between the published and predicted structures, are indicated.

FIG. S3

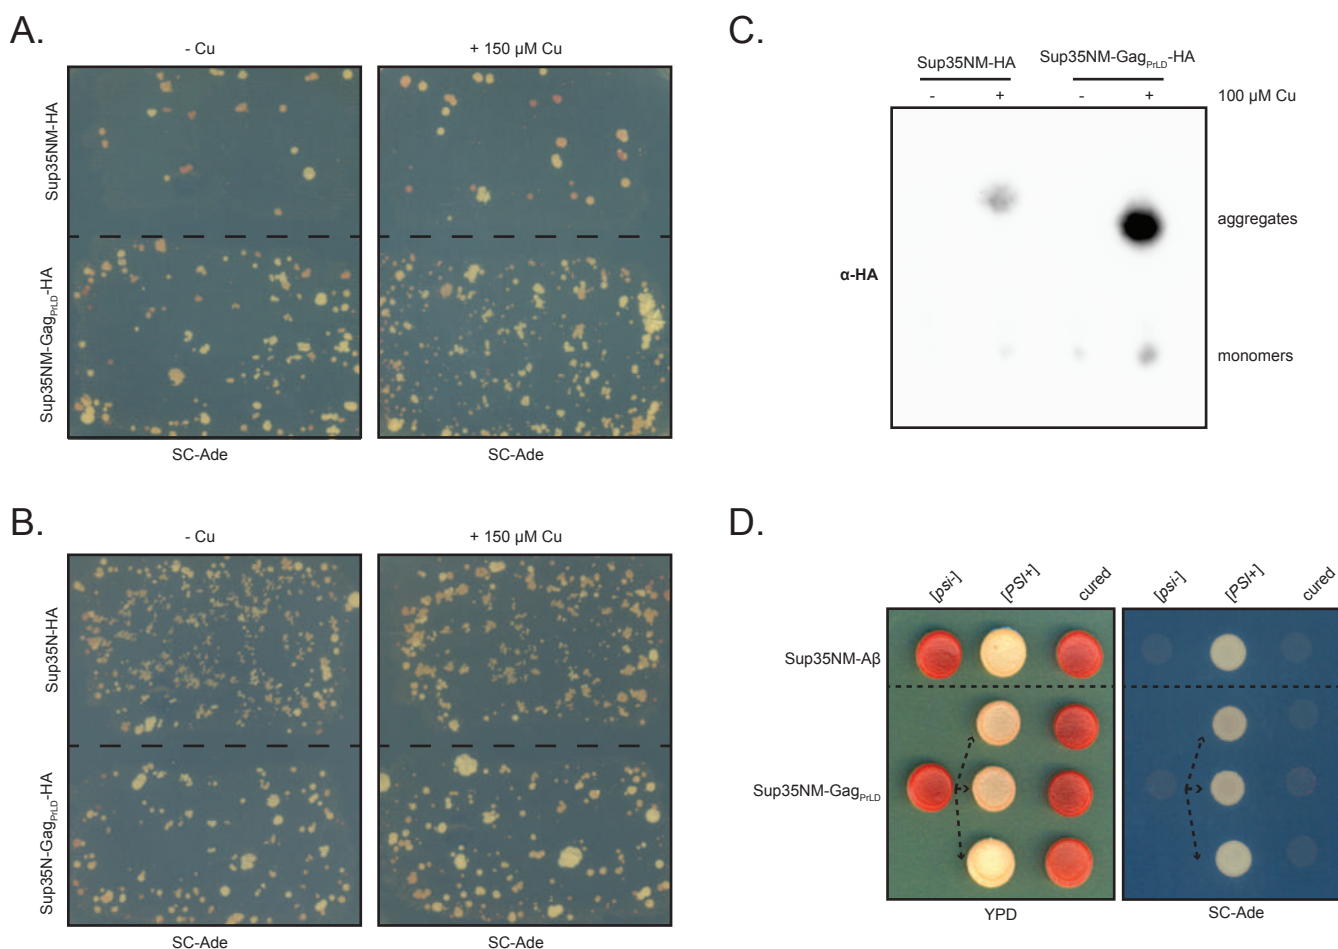

**Fig S3.** Gag<sub>PrLD</sub> nucleates a Sup35-based prion reporter. (A and B) Qualitative prionogenesis of Sup35 fusions; growth on SC-Ade indicates either a suppressor mutation or [PSI<sup>+</sup>] prionogenesis. Expression of Sup35 fusions were induced with 150  $\mu$ M CuSO<sub>4</sub>. A representative image of at least 3 experiments is shown. (C) SDD-AGE analysis of Sup35NM-HA with and without Gag<sub>PrLD</sub> fusion. Expression of Sup35 fusions were induced with 100  $\mu$ M CuSO<sub>4</sub>. Monomers and high-molecular weight aggregates of chimeric proteins were detected with anti-HA antibody. A representative image of at least 3 experiments is shown. (D) Curing of Ade<sup>+</sup> colonies by guanidine hydrochloride (GdHCl) of Sup35NM chimeras. One [psi<sup>-</sup>] Sup35NM-A $\beta$  fusion control strain is shown induced to [PSI<sup>+</sup>] and cured. Three independent inductions of a [psi<sup>-</sup>] Sup35NM-GagPrLD fusion are shown induced to [PSI<sup>+</sup>] and cured. [PSI<sup>+</sup>] yeast cells are white on YPD and grow on SC-Ade while [psi<sup>-</sup>] and cured cells are red on YPD and do not grow on SC-Ade.

FIG. S4

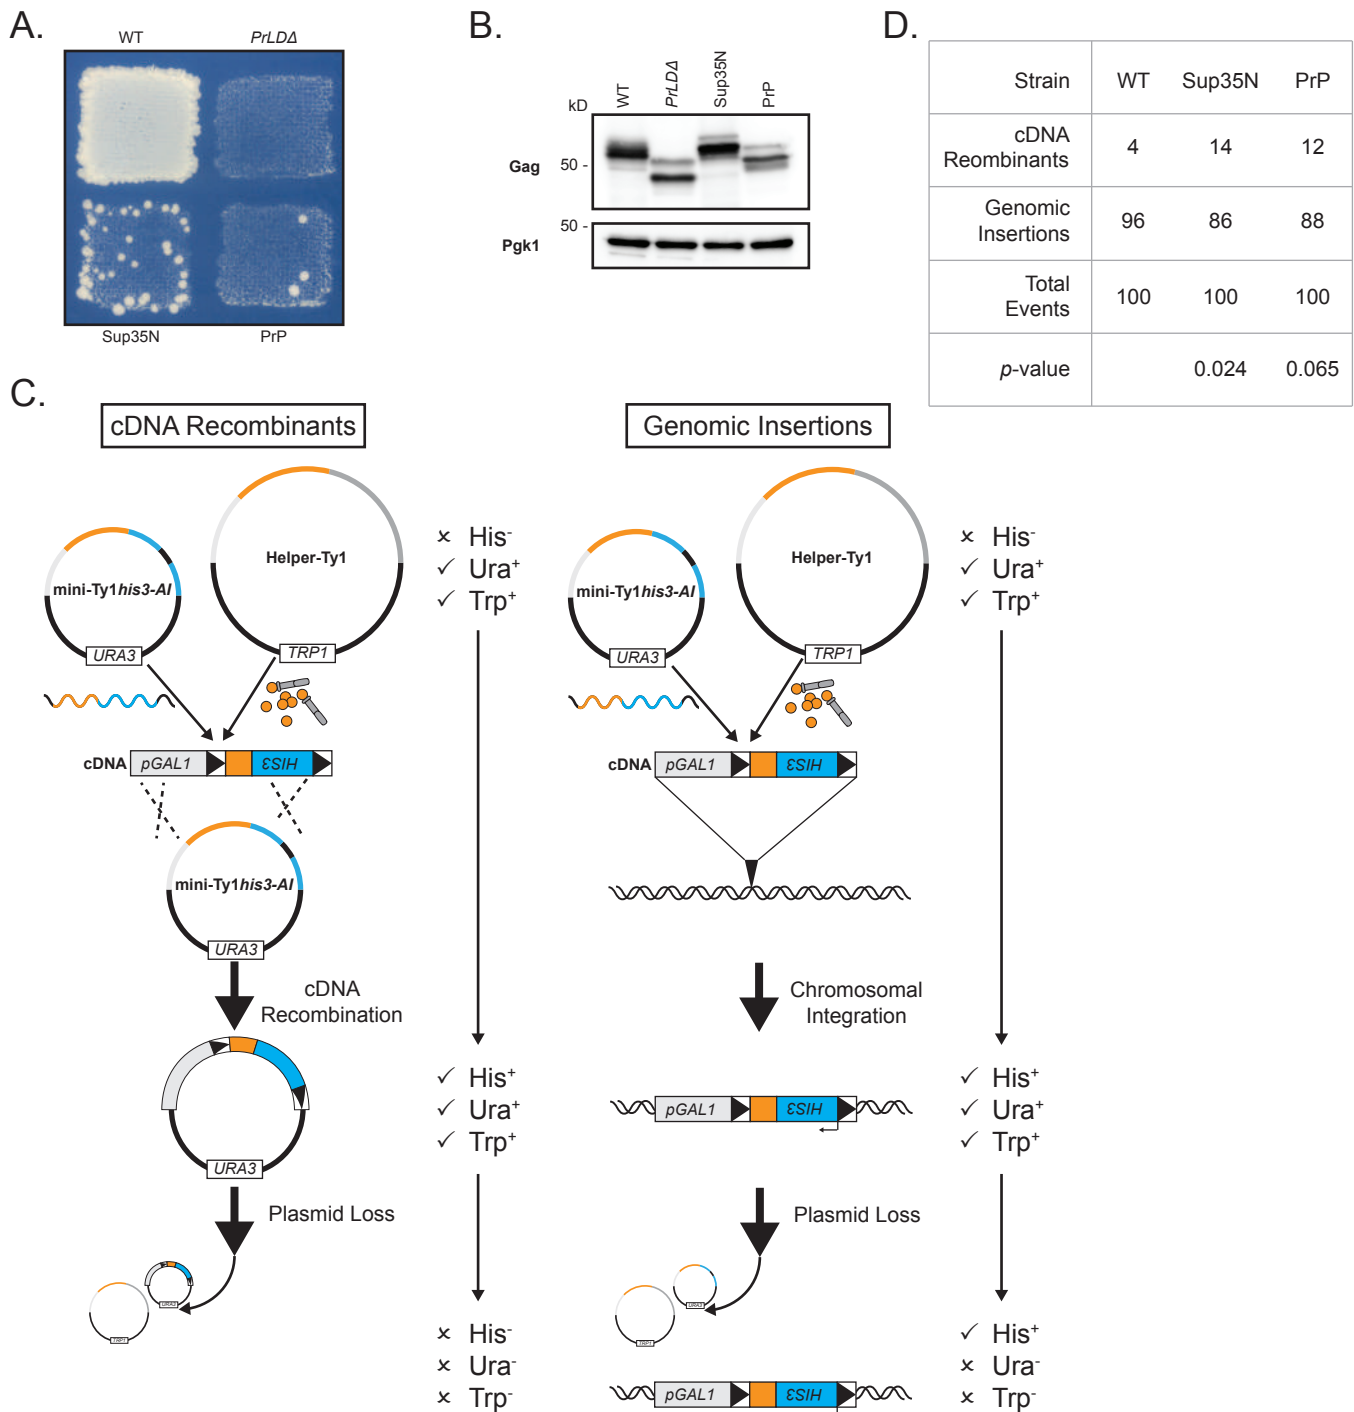

**Fig S4.** Gag chimeras likely disrupt Ty1 RNA functions and modestly increase cDNA recombination with plasmid-borne mini-Ty1*his3-AI*. (A) Qualitative retromobility of chimeric Gag constructs in a single pGTy1*his3-AI* plasmid. Growth on media lacking histidine indicates a retromobility event. A representative image of at least 3 replicates is shown. (B) Protein extracts prepared from galactose-induced yeast cells expressing the indicated Gag constructs in a single plasmid were immunoblotted for Gag. Pgk1 serves as a loading control. Migration of molecular weight standards is shown alongside the immunoblots. A representative image of at least 3 replicates is shown. (C) Schematic of two major retromobility pathways that lead to His<sup>+</sup> cells detected in retromobility assays using Ty-less strains. cDNA recombination and genomic insertion can be differentiated by allowing for plasmid loss after a retromobility event and testing for the retention of growth on medium lacking histidine. (D) Table indicating the ratio of cDNA recombinants versus genomic insertions, *p*-values are compared to wildtype.

## FIG. S5

A.

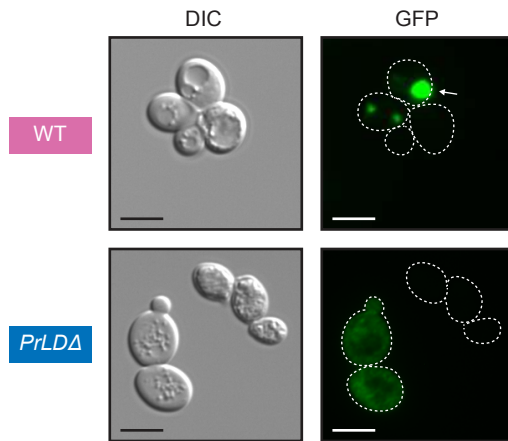

B.

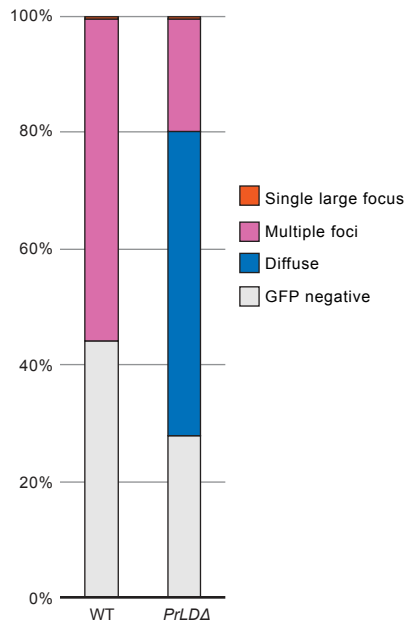

**Fig S5.** Chimeric Gag-GFP after 48 hr galactose induction. (A) Live-cell yeast fluorescence microscopy of strains expressing chimeric Gag-GFP after 48 hr galactose induction. Normaski (DIC) and GFP channels are shown with cell outlines added to GFP channels based on DIC images. The strain labels are colored to match the most common foci observed. White arrows indicate cells with a single large focus. Scale bars represent 5 μm. (B) Quantitation of categories of foci observed as a percentage. The multiple foci category includes cells with multiple large foci, one or more small foci, or a combination of both sizes. Exact cell counts are provided in Supplementary Table 2.



FIG. S6

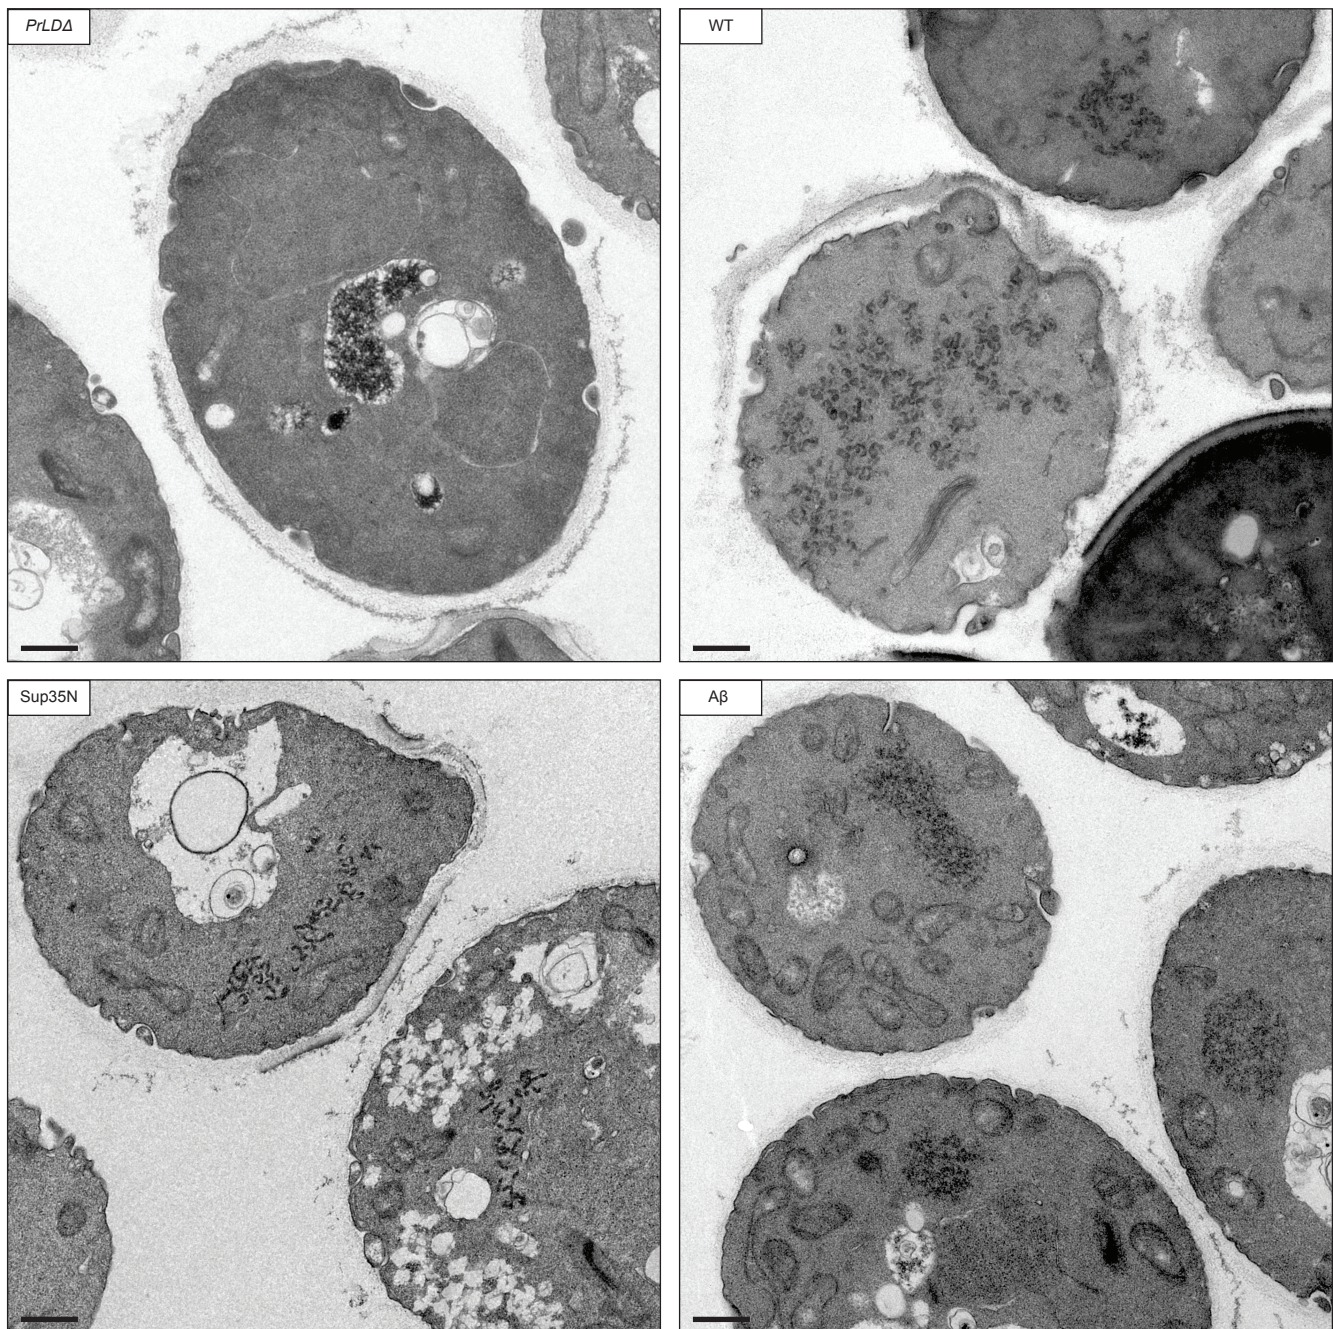

**Fig S6.** Thin-section TEM of Gag-GFP strains. Thin-section TEM of 24 hr galactose-induced cells expressing Gag-GFP chimeras. Representative cells are shown. Scale bars represent 500 nm.

## FIG. S7

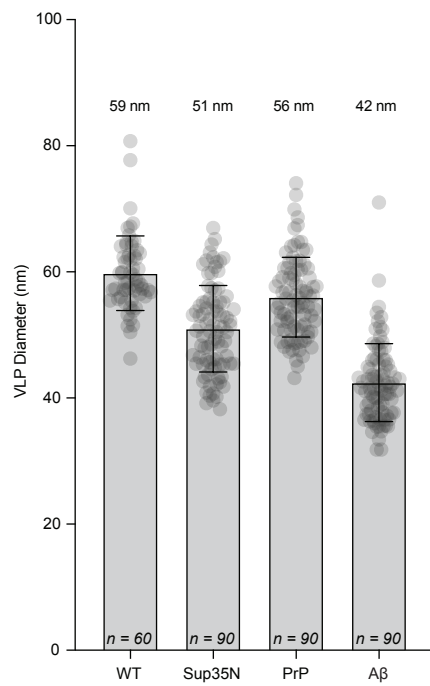

**Fig S7.** VLP diameter of Gag-PrLD chimeras. Diameter measurements of particles in galactose-induced cells expressing Gag chimeras visualized by thin-section TEM. Each bar represents the mean diameter, displayed as points, and the error bar  $\pm$  the standard deviation. The median diameter is noted above each bar, the number of particles measured is noted at the base of each bar. Particles from all strains are significantly smaller as calculated from a two-sided Student's *t*-test compared with WT.

909 Supplementary Table S1. Retromobility frequencies.

| Strain | Label        | Retromobility<br>Frequency | Std Dev               | $p$ -value <sup>a</sup> | Biological<br>replicates |
|--------|--------------|----------------------------|-----------------------|-------------------------|--------------------------|
| DG4457 | WT           | $6.46 \times 10^{-5}$      | $2.72 \times 10^{-5}$ | Reference               | 20                       |
| DG4197 | <i>PrLDΔ</i> | $8.75 \times 10^{-9}$      | $2.47 \times 10^{-8}$ | $4.75 \times 10^{-7}$   | 8                        |
| DG4198 | Sup35N       | $6.57 \times 10^{-5}$      | $3.59 \times 10^{-5}$ | 0.933                   | 8                        |
| DG4201 | Ure2         | 0                          | 0                     | $4.74 \times 10^{-7}$   | 8                        |
| DG4242 | PrP          | $1.22 \times 10^{-6}$      | $5.59 \times 10^{-7}$ | $6.51 \times 10^{-7}$   | 8                        |
| DG4241 | A $\beta$    | 0                          | 0                     | $4.74 \times 10^{-7}$   | 8                        |

910 <sup>a</sup> Calculated by two-sided Student's *t*-test



911 Supplementary Table S2. Gag-GFP chimera fluorescent microscopy cell counts.

| Strain                 | Label        | GFP<br>negative | Diffuse | Multiple<br>foci <sup>a</sup> | Single large<br>focus | Total<br>cells |
|------------------------|--------------|-----------------|---------|-------------------------------|-----------------------|----------------|
| <i>24 hr induction</i> |              |                 |         |                               |                       |                |
| DG4513                 | WT           | 32              | 0       | 307                           | 2                     | 341            |
| DG4514                 | <i>PrLDΔ</i> | 48              | 293     | 50                            | 0                     | 391            |
| DG4515                 | Sup35N       | 24              | 4       | 276                           | 5                     | 309            |
| DG4516                 | Ure2         | 38              | 320     | 7                             | 0                     | 365            |
| DG4517                 | PrP          | 44              | 45      | 196                           | 48                    | 333            |
| DG4518                 | Aβ           | 65              | 23      | 127                           | 89                    | 304            |
| <i>48 hr induction</i> |              |                 |         |                               |                       |                |
| DG4513                 | WT           | 108             | 0       | 135                           | 1                     | 244            |
| DG4514                 | <i>PrLDΔ</i> | 83              | 159     | 58                            | 1                     | 301            |

912 <sup>a</sup> This category includes multiple large foci, one or more small foci, or a combination of both sizes.

913 Supplementary Table S3. Yeast strains used in this study.

| Strain  | Genotype                                                                                                                        | Plasmids         | Source     |
|---------|---------------------------------------------------------------------------------------------------------------------------------|------------------|------------|
| GT409   | <i>Saccharomyces cerevisiae</i> MAT $\alpha$ <i>ade1-14 his3 leu2-3,112 lys2 trp1 ura3-52 [psi<sup>-</sup> pin<sup>-</sup>]</i> |                  | (53)       |
| SLBY294 | GT409                                                                                                                           | SLBB027          | This study |
| SLBY286 | GT409                                                                                                                           | SLBB021          | This study |
| SLBY295 | GT409                                                                                                                           | SLBB028          | This study |
| SLBY287 | GT409                                                                                                                           | SLBB022          | This study |
| SLBY285 | GT409                                                                                                                           | SLBB020          | This study |
| DG4218  | GT409                                                                                                                           | BDG1691          | This study |
| DG4219  | GT409                                                                                                                           | BDG1701          | This study |
| DG3582  | <i>Saccharomyces paradoxus</i> MAT $\alpha$ <i>gal3 his3-<math>\Delta</math>200hisG trp1-1* ura3 Ty-less</i>                    |                  | (58)       |
| DG4457  | DG3582                                                                                                                          | BDG1647, BDG1781 | This study |
| DG4197  | DG3582                                                                                                                          | BDG1647, BDG1680 | This study |
| DG4198  | DG3582                                                                                                                          | BDG1647, BDG1681 | This study |
| DG4201  | DG3582                                                                                                                          | BDG1647, BDG1684 | This study |
| DG4241  | DG3582                                                                                                                          | BDG1647, BDG1712 | This study |
| DG4242  | DG3582                                                                                                                          | BDG1647, BDG1713 | This study |
| DG4441  | DG3582                                                                                                                          | BDG673, BDG674   | This study |
| DG4156  | DG3582                                                                                                                          | BDG598           | This study |
| DG4447  | DG3582                                                                                                                          | SLBB050          | This study |
| DG4448  | DG3582                                                                                                                          | SLBB051          | This study |
| DG4449  | DG3582                                                                                                                          | SLBB052          | This study |
| DG4513  | DG3582                                                                                                                          | BDG1799          | This study |
| DG4514  | DG3582                                                                                                                          | BDG1800          | This study |
| DG4515  | DG3582                                                                                                                          | BDG1801          | This study |
| DG4516  | DG3582                                                                                                                          | BDG1802          | This study |
| DG4517  | DG3582                                                                                                                          | BDG1803          | This study |
| DG4518  | DG3582                                                                                                                          | BDG1804          | This study |

914

915 Supplementary Table S4. Plasmids used in this study.

| Plasmid  | Description                                 | Markers                       | Source       |
|----------|---------------------------------------------|-------------------------------|--------------|
| pBDG598  | pGTy1 <i>his3-AI</i>                        | <i>URA3/2<math>\mu</math></i> | (59)         |
| pSLBB050 | pBDG598- <i>PrLD</i> $\Delta$               | <i>URA3/2<math>\mu</math></i> | This study   |
| pSLBB051 | pBDG598-Sup35N <sub>2-123</sub>             | <i>URA3/2<math>\mu</math></i> | This study   |
| pSLBB052 | pBDG598-PrP <sub>90-159</sub>               | <i>URA3/2<math>\mu</math></i> | This study   |
| pBDG1647 | pGTy1 <i>hisAI</i> - $\Delta$ nt818-5463    | <i>URA3/2<math>\mu</math></i> | (6)          |
| pBDG1781 | pGTy1nt.241-5561                            | <i>TRP1/2<math>\mu</math></i> | This study   |
| pBDG1680 | pBDG1781- <i>PrLD</i> $\Delta$              | <i>TRP1/2<math>\mu</math></i> | This study   |
| pBDG1681 | pBDG1781-Sup35N <sub>2-123</sub>            | <i>TRP1/2<math>\mu</math></i> | This study   |
| pBDG1684 | pBDG1781-Ure2 <sub>17-76</sub>              | <i>TRP1/2<math>\mu</math></i> | This study   |
| pBDG1712 | pBDG1781-A $\beta$ <sub>1-42</sub>          | <i>TRP1/2<math>\mu</math></i> | This study   |
| pBDG1713 | pBDG1781-PrP <sub>90-159</sub>              | <i>TRP1/2<math>\mu</math></i> | This study   |
| pBDG673  | pRS424                                      | <i>TRP1/2<math>\mu</math></i> | (97)         |
| pBDG674  | pRS426                                      | <i>URA3/2<math>\mu</math></i> | (97)         |
| pBDG1691 | pCUP1-SUP35NM-A $\beta$ <sub>1-42</sub>     | <i>URA3/CEN</i>               | (53)         |
| pBDG1701 | pCUP1-SUP35NM-Gag <sub>PrLD</sub>           | <i>URA3/CEN</i>               | This study   |
| pSLBB020 | pCUP1-SUP35NM-A $\beta$ <sub>1-42</sub> -HA | <i>URA3/CEN</i>               | This study   |
| pSLBB021 | pCUP1-SUP35NM-Gag <sub>PrLD</sub> -HA       | <i>URA3/CEN</i>               | This study   |
| pSLBB022 | pCUP1-SUP35N-Gag <sub>PrLD</sub> -HA        | <i>URA3/CEN</i>               | This study   |
| pSLBB027 | pCUP1-SUP35NM-HA                            | <i>URA3/CEN</i>               | <sup>a</sup> |
| pSLBB028 | pCUP1-SUP35N-HA                             | <i>URA3/CEN</i>               | (53)         |
| pBDG1799 | pGAL-Gag <sub>1-401</sub> -GFP              | <i>HIS3/CEN</i>               | This study   |
| pBDG1800 | pBDG1799- <i>PrLD</i> $\Delta$              | <i>HIS3/CEN</i>               | This study   |
| pBDG1801 | pBDG1799-Sup35N <sub>2-123</sub>            | <i>HIS3/CEN</i>               | This study   |
| pBDG1802 | pBDG1799-Ure2 <sub>17-76</sub>              | <i>HIS3/CEN</i>               | This study   |
| pBDG1803 | pBDG1799-A $\beta$ <sub>1-42</sub>          | <i>HIS3/CEN</i>               | This study   |
| pBDG1804 | pBDG1799-PrP <sub>90-159</sub>              | <i>HIS3/CEN</i>               | This study   |

916 <sup>a</sup> Kindly provided by Y. Chernoff.



917 Supplementary Table S5. Primers used in this study.

| <b>Construct</b> | <b>Description</b> | <b>Oligos (5' - 3')</b>                        |
|------------------|--------------------|------------------------------------------------|
| SLBP0045         | SupM-PrLDF         | GAAGTGGATGACGAAGTTGAATTCAACCCCATCATGCCTCTCC    |
| SLBP0046         | SupN-PrLDF         | CAACCACAGTCTCAAGGTGAATTCAACCCCATCATGCCTCTCC    |
| SLBP0047         | Sup-PrLDR          | CACCGGGTGGCGCGCTCTAGATTATGATGATGGATACTGCGG     |
| SLBP0086         | HAtag-SacII        | TACCCATACGACGTACCAGATTACGCTTGACCGGGTGGAGCTCCAA |
| SLBP0087         | GagPrLD-HA         | CAGTATCCATCATCATACCCATACGACGTA                 |
| SLBP0088         | AB42-HA            | GGTGTTCATAGCGTACCCATACGACGTA                   |
| SLBP0194         | Ty1 779 Rev        | CATATCAGAGTCCGCTGAGG                           |
| SLBP0116         | Ty1 835 Rev        | GGAAAGTCATTAGGTGAGG                            |
| SLBP0117         | GTy1 Xho Fwd       | GTATTACTTCTTATTCTCGAGG                         |
| SLBP0221         | pRS Fwd            | TTGGGTACCGGGCCC                                |
| SLBP0222         | pRS Rev            | AAAGCTGGAGCTCCACC                              |

918

919 Supplementary Table S6. Gene fragments used in this study.

| Construct | Description       | Oligos (5' - 3')                                                                                                                                                                                                                                                                                                                                                                                                                                                      |
|-----------|-------------------|-----------------------------------------------------------------------------------------------------------------------------------------------------------------------------------------------------------------------------------------------------------------------------------------------------------------------------------------------------------------------------------------------------------------------------------------------------------------------|
| SLBG0024  | Ty1 XhoI PrLD     | ACTTCTTATTCCTCTACCGCCTCGAGGAGAACTTCTAGTATATTCTGTATACCT<br>AATATTATAGCCTTTATCAACAATGGAATCCCAACAATTATCTCAACATTCACC<br>CAATTCTCATGGTAGCGCCTGTGCTTCGGTTACTTCTAAGGAAGTCCACACAAA<br>TCAAGATCCGTTAGACGTTTCAGCTTCCAAAACAGAAGAATGTGAGAAGGCTTC<br>CACTAAGGCTAACTCTCAACAGACAACAACACCTGCTTCATCAGCTGTTCCAGA<br>G                                                                                                                                                                   |
| SLBG0025  | Ty1 702-840       | GTTGGAACGCCTCTGAGCACTCCATCACCTGAGTCAGGTAATACATTTACTGAT<br>TCATCCTCAGCGGACTCTGATATGACATCCACTAAAAAATATGTCAGACCACCA<br>CCAATGTAACTCACCTAATGACTTTCCAA                                                                                                                                                                                                                                                                                                                     |
| SLBG0026  | Ty1 Sup35N        | ACAACACCTGCTTCATCAGCTGTTCCAGAGTCGGATTCAAACCAAGGCAACAAT<br>CAGCAAAACTACCAGCAATACAGCCAGAACGGTAACCAACAACAAGGTAACAAC<br>AGATACCAAGGTTATCAAGCTTACAATGCTCAAGCCCAACCTGCAGGTGGGTAC<br>TACCAAAATTACCAAGGTTATTCTGGGTACCAACAAGGTGGCTATCAACAGTAC<br>AATCCCAGCGCGGTTACCAGCAACAGTATAATCCTCAAGGAGGCTATCAACAG<br>TACAATCCTCAAGGCGGTTATCAGCAGCAATTCAATCCACAAGGTGGCCGTGGA<br>AATTACAAAACCTTCAACTACAATAACAATTTGCAAGGATATCAAGCTGGTTTC<br>CAACCACAGTCTCAAGGTGTTGGAACGCCTCTGAGCACTCCATCACCT |
| SLBG0029  | Ty1 Ure2          | ACAACACCTGCTTCATCAGCTGTTCCAGAGCGTCAAGTAAACATAGGAAACAGG<br>AACAGTAATACAACCACCGATCAAAGTAATATAAATTTTGAATTTTCAACAGGT<br>GTAAATAATAATAATAATAACAATAGCAGTAGTAATAACAATAATGTTCAAAAC<br>AATAACAGCGGCCGAATGGTAGCCAAAATAATGATAACGAGAATAATGTTGGA<br>ACGCCTCTGAGCACTCCATCACCT                                                                                                                                                                                                       |
| SLBG0030  | Ty1 PrLD $\Delta$ | ACTTCTTATTCCTCTACCGCCTCGAGGAGAACTTCTAGTATATTCTGTATACCT<br>AATATTATAGCCTTTATCAACAATGGAATCCCAACAATTATCTCAACATTCACC<br>CAATTCTCATGGTAGCGCCTGTGCTTCGGTTACTTCTAAGGAAGTCCACACAAA<br>TCAAGATCCGTTAGACGTTTCAGCTTCCAAAACAGAAGAATGTGAGAAGGCTTC<br>CACTAAGGCTAACTCTCAACAGACAACAACACCTGCTTCATCAGCTGTTCCAGA<br>GGTTGGAACGCCTCTGAGCACTCCATCACCTGAGTCAGGTAATACATTTACTGA<br>TTCATCCTCAGCGGACTCTGATATGACATCCACTAAAAAATATGTCAGACCACC<br>ACCAATGTAACTCACCTAATGACTTTCCAA                  |

SLBG0035 Ty1 Abeta CTTTCATCAGCTGTTCCAGAGGATGCAGAGTTCGACATGACTCAGGATATGAAG  
TTCATCATCAAAAATTGGTGTCTTTGCAGAAGATGTGGGTTCAAACAAAGGTG  
CAATCATTGGACTCATGGTGGGCGGTGTTGTCATAGCGGTTGGAACGCCTCTGA  
GCAC

SLBG0036 Ty1 PrP CTTTCATCAGCTGTTCCAGAGCAGGGAGGAGGTACACACAATCAGTGAATAAAC  
CAAGCAAACCGAAGACGAACTTGAAACACGTCGCCGGCGCCGGCTGCAGGGG  
CGGTTGTTGGAGGACTTGGTGGGTATATGCTGGGCAGTGCTATGAGCCGTCCCA  
TGATCCATTTTGGTAACGATTGGGAAGACCGTTATTATAGGGAGAACATGTATA  
GGTACCCTAATCAGGTTGGAACGCCTCTGAGCAC

---

920
